# Supplementary material
Source: PubMed Central journal article supplement (PMC5935551)

| K-T lineages                                         | Other lineages                                           | Dietary categories                                    |
|------------------------------------------------------|----------------------------------------------------------|-------------------------------------------------------|
| <span style="color: red;">■</span> Carnivora         | <span style="color: brown;">■</span> Afrotheria          | <span style="color: gray;">●</span> Herbivore         |
| <span style="color: green;">■</span> Cetartiodactyla | <span style="color: lightgreen;">■</span> Perissodactyla | <span style="color: gray;">▲</span> Omnivore          |
| <span style="color: yellow;">■</span> Chiroptera     | <span style="color: tan;">■</span> Kangaroo              | <span style="color: gray;">■</span> Pred. carnivore   |
| <span style="color: blue;">■</span> Primates         | <span style="color: darkgray;">■</span> Rabbit           | <span style="color: gray;">◆</span> Invert. carnivore |
| <span style="color: purple;">■</span> Xenarthra      | <span style="color: pink;">■</span> Rodentia             |                                                       |

A

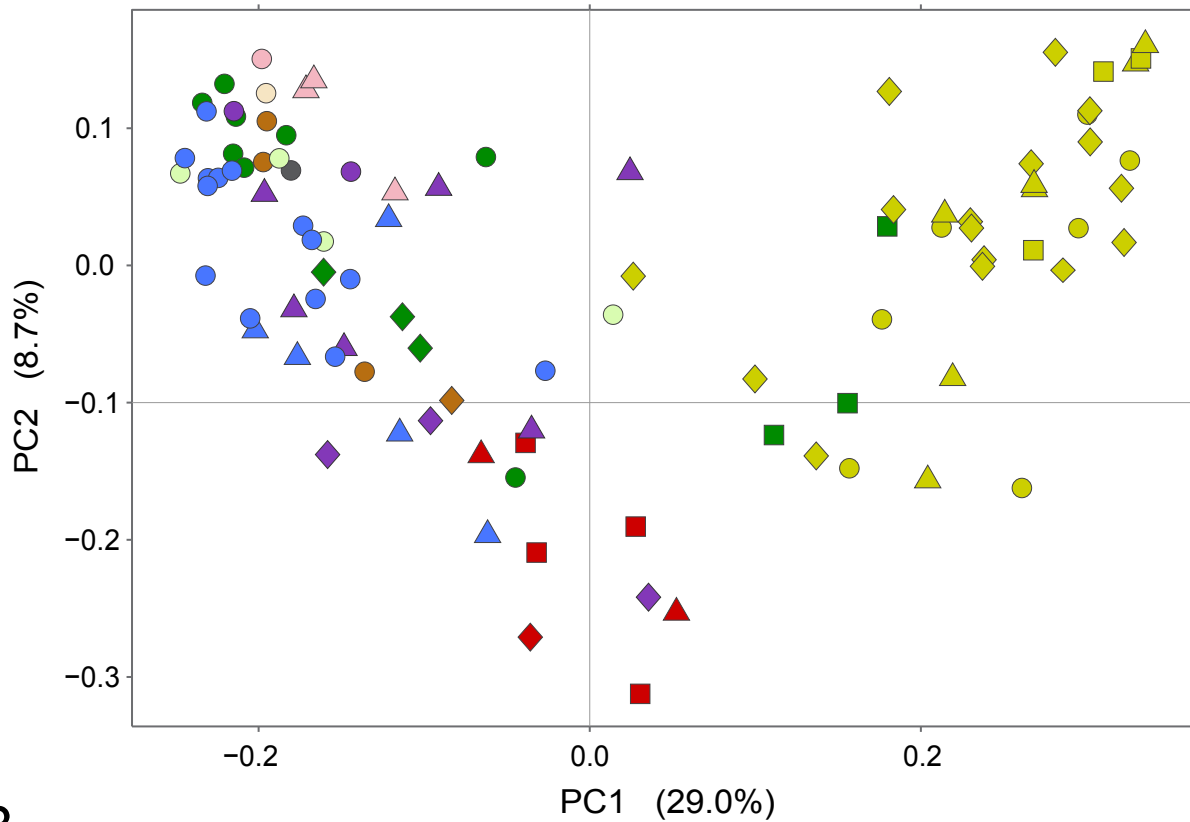

B

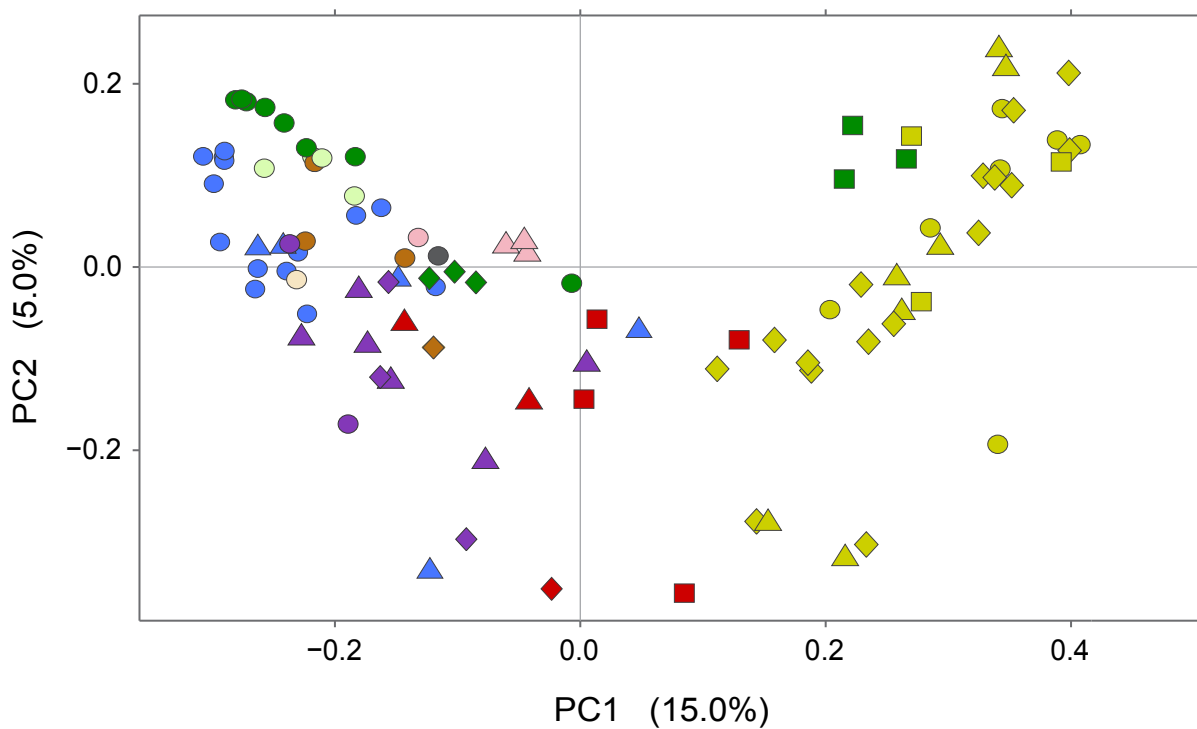

Supplement: NIHMS932192-supplement-Supp_FigS5.pdf [file NIHMS932192-supplement-Supp_FigS5.pdf]
