# Supplementary material
Source: PubMed Central journal article supplement (PMC5935551)

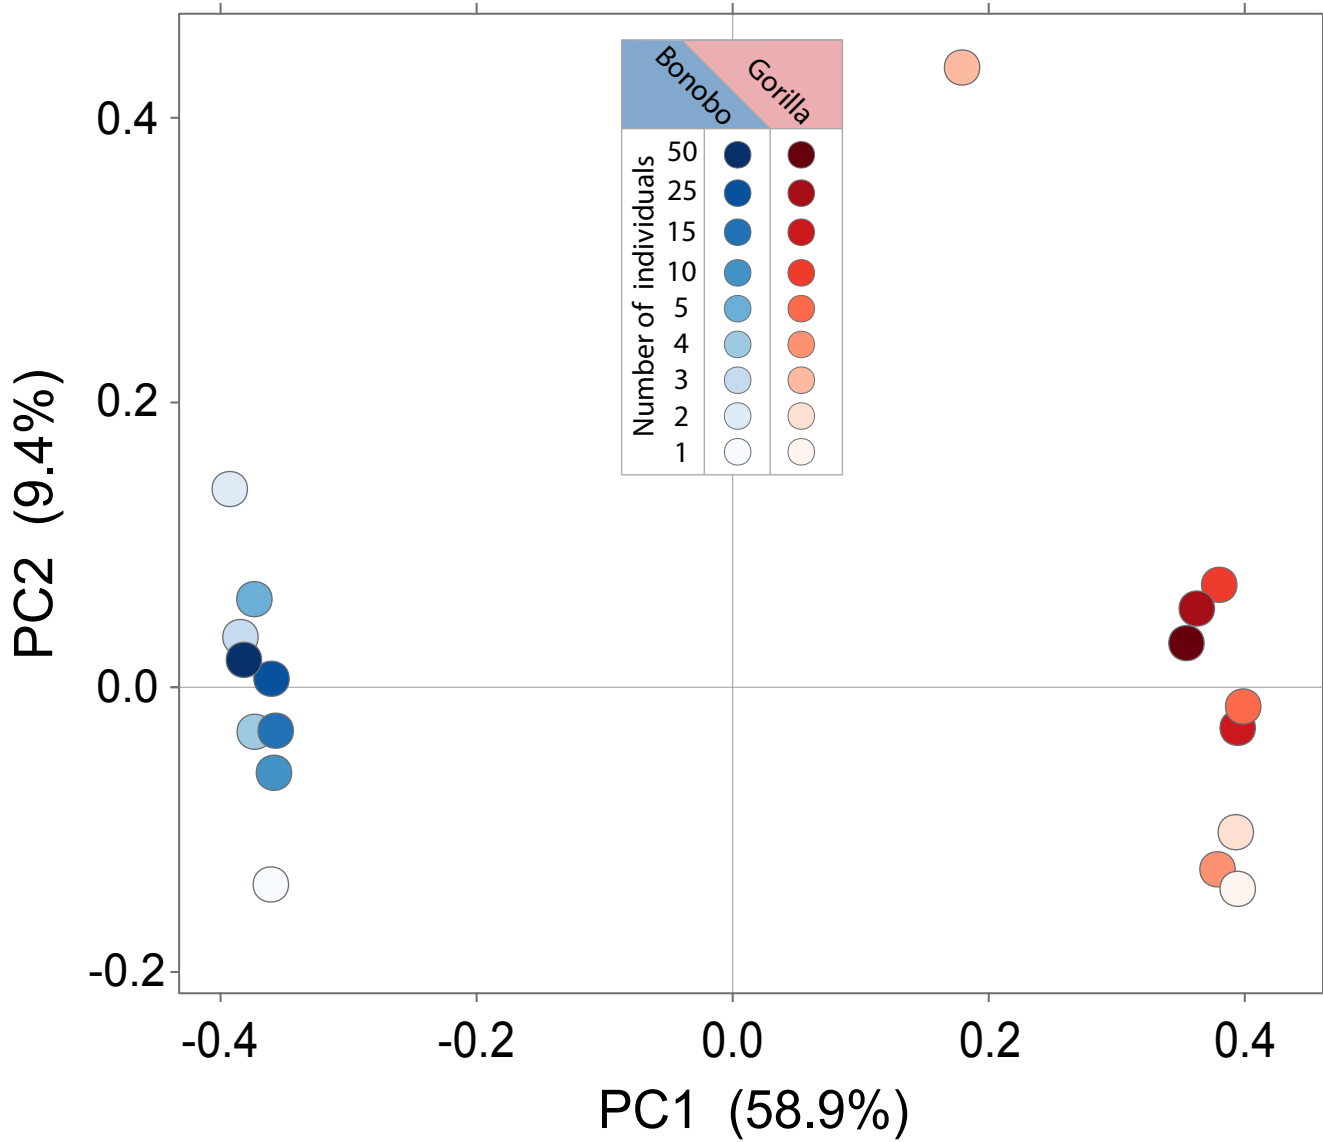

Supplement: NIHMS932192-supplement-Supp_FigS1.pdf [file NIHMS932192-supplement-Supp_FigS1.pdf]

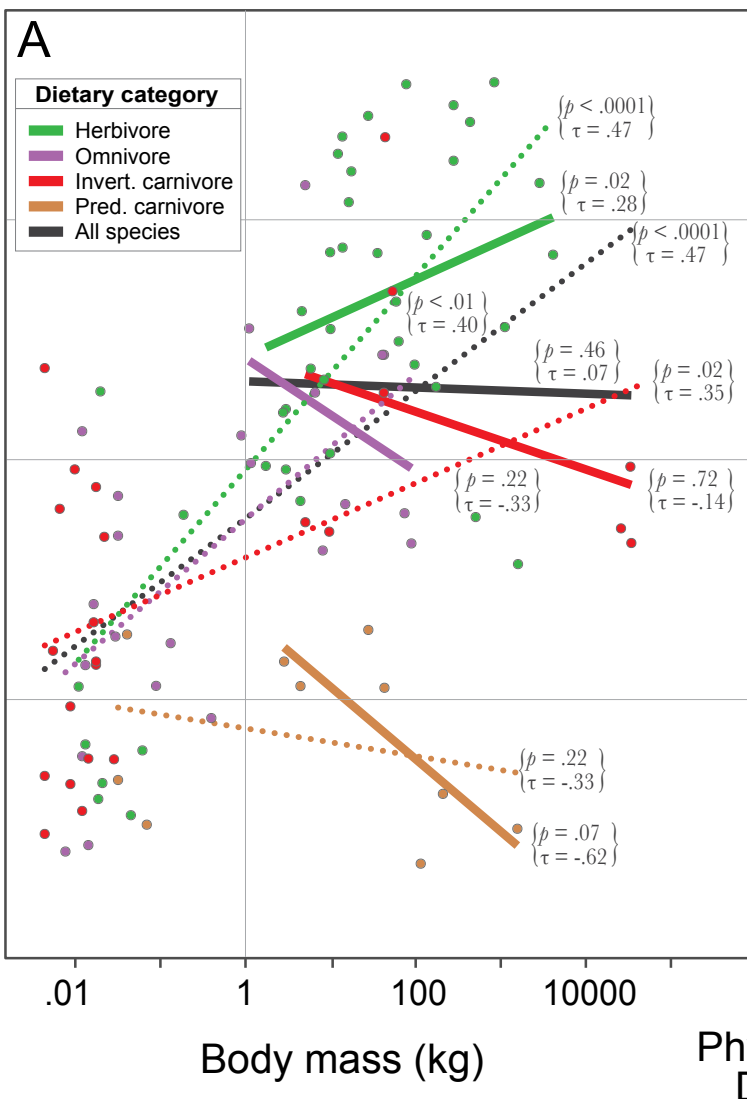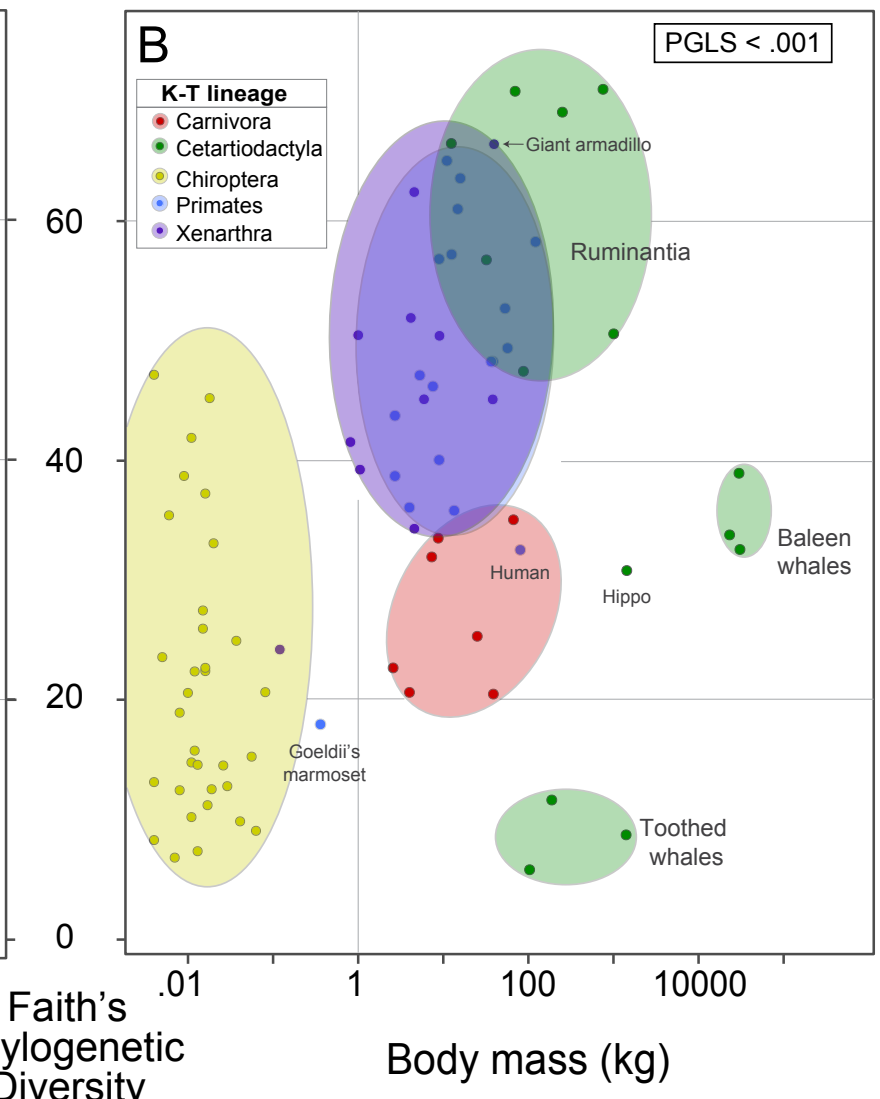

Supplement: NIHMS932192-supplement-Supp_FigS2.pdf [file NIHMS932192-supplement-Supp_FigS2.pdf]

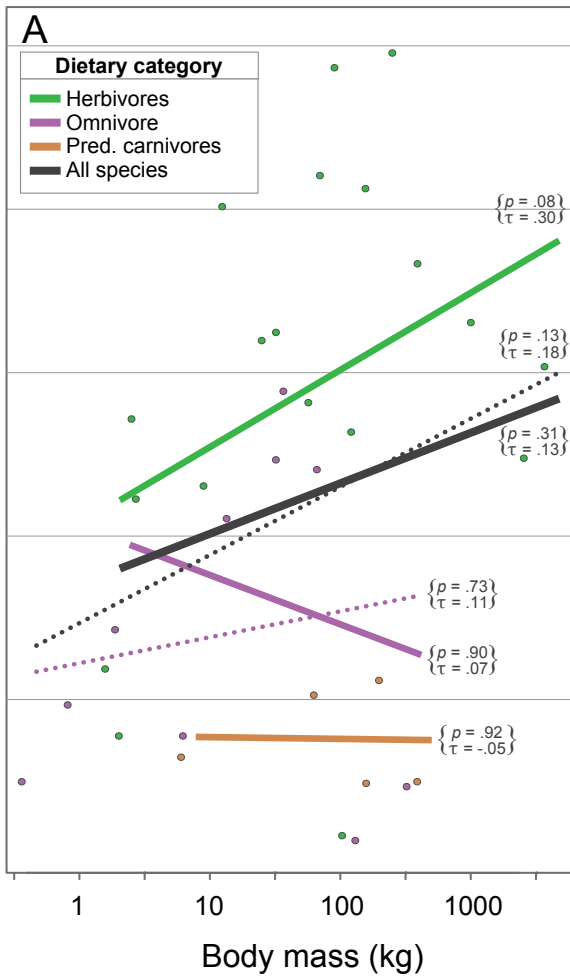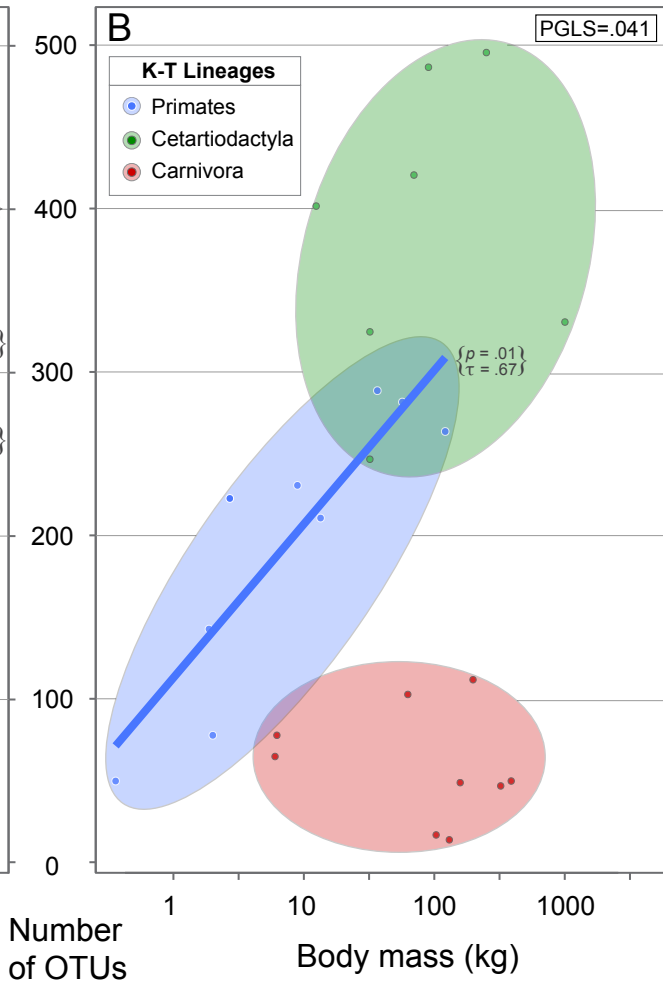

Supplement: NIHMS932192-supplement-Supp_FigS3.pdf [file NIHMS932192-supplement-Supp_FigS3.pdf]

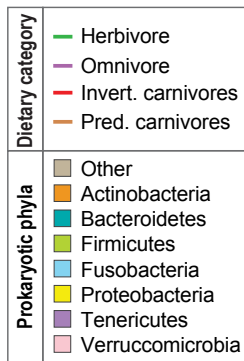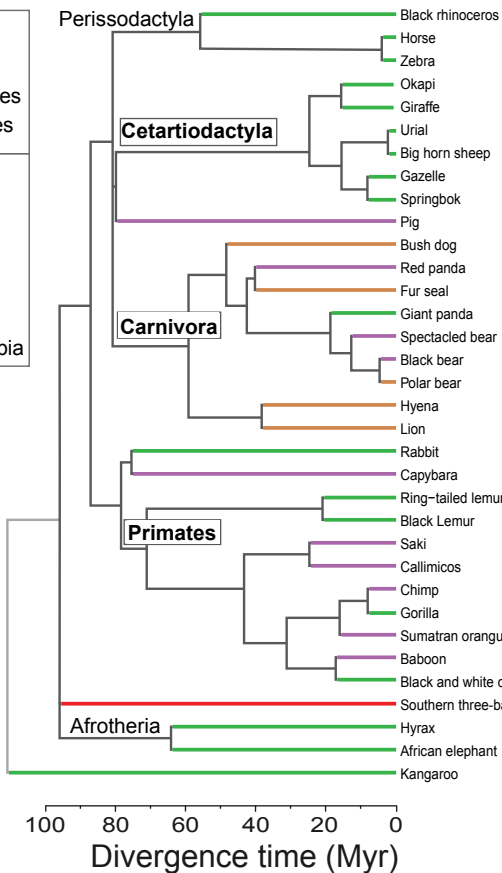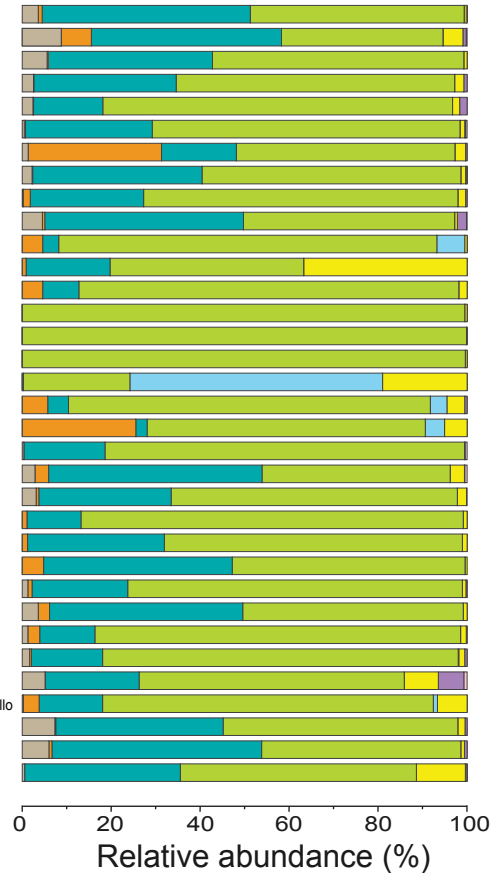

Supplement: NIHMS932192-supplement-Supp_FigS4.pdf [file NIHMS932192-supplement-Supp_FigS4.pdf]

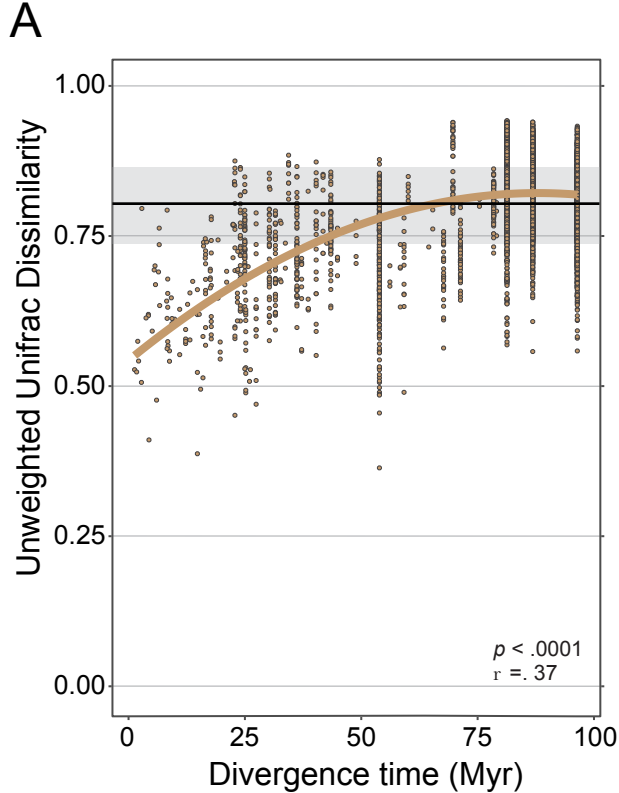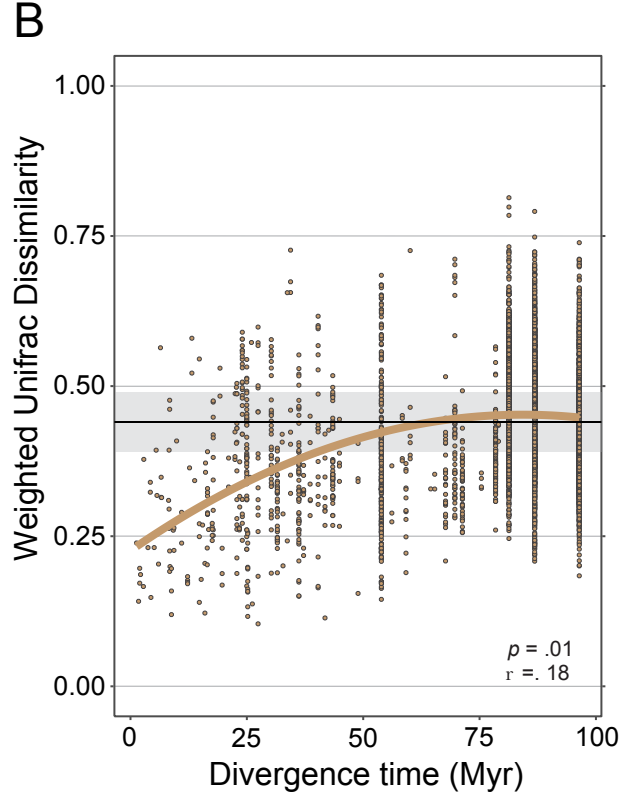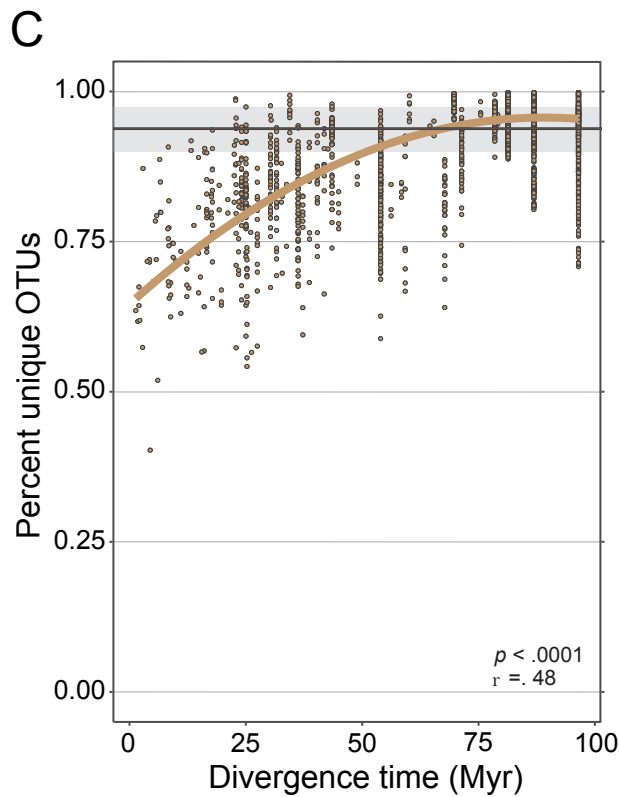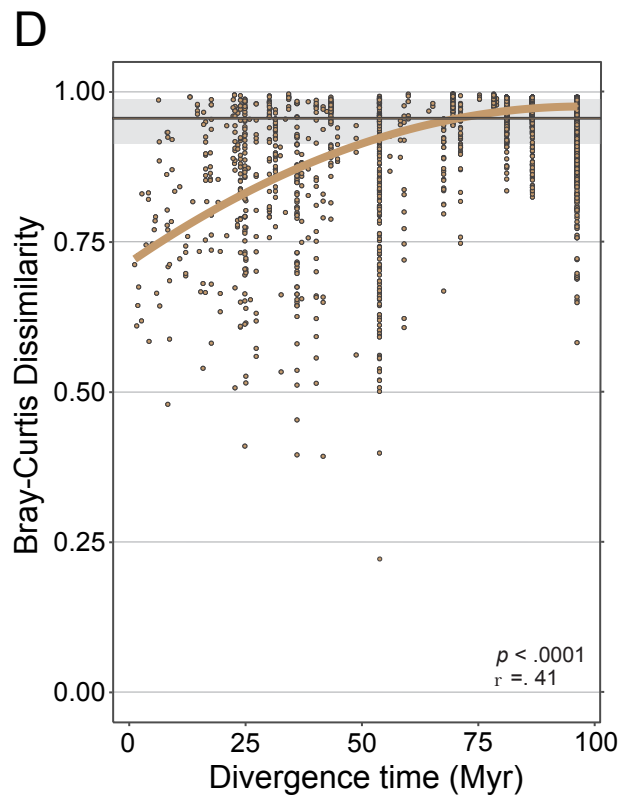

Supplement: NIHMS932192-supplement-Supp_FigS7.pdf [file NIHMS932192-supplement-Supp_FigS7.pdf]

Unweighted Unifrac Dissimilarity

0.8  
0.6  
0.4

0

40

80

Divergence time (Myr)

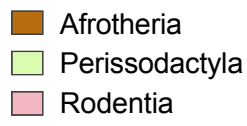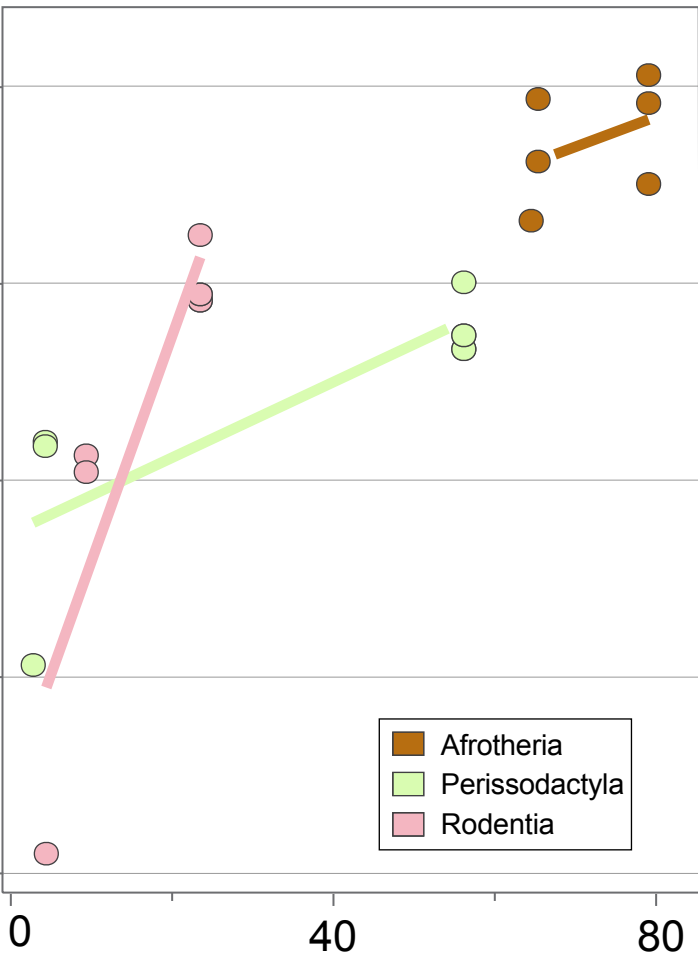

Supplement: NIHMS932192-supplement-Supp_FigS8.pdf [file NIHMS932192-supplement-Supp_FigS8.pdf]

Unweighted Unifrac Dissimilarity

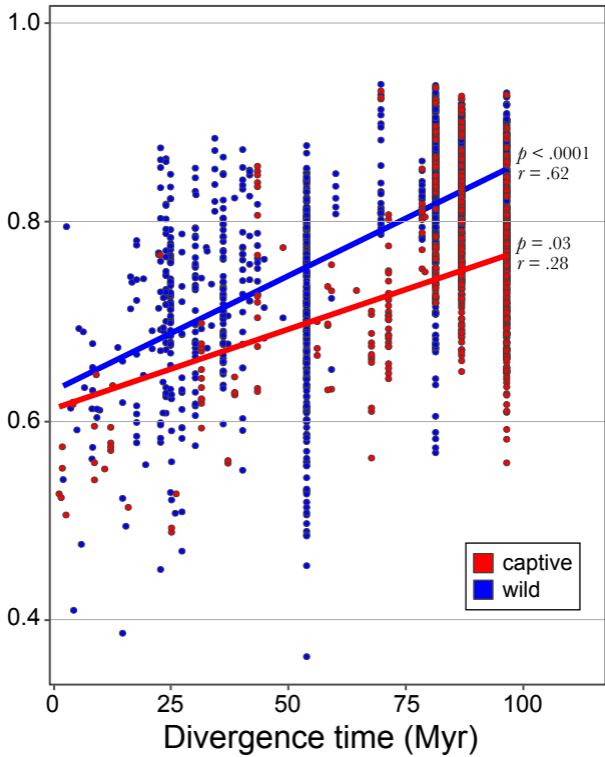

Supplement: NIHMS932192-supplement-Supp_FigS9.pdf [file NIHMS932192-supplement-Supp_FigS9.pdf]
